# Supplementary material
Source: publisher site journal article supplement (https://www.dovepress.com/article/396330)

**Supplementary Material**

**Appendix 1** – Brazilian Society Guideline for Glaucoma reference.

Ventura PV, Omi CA, Suzuki Jr ER, Tavares IM, Melo Jr LAS. 1.0 Consenso de Cirurgia de Glaucoma, first edition, Ipsis Gráfica e Editora, São Paulo, May 2017.

Unfortunately, the guideline has only a Portuguese version. Please see the complete pdf <https://www.sbglaucoma.org.br/wp-content/uploads/2017/05/livreto.pdf>

**Appendix 2** – Figures 3-9.

**Figure 3**. Ahmed FP7 glaucoma drainage device (GDD).


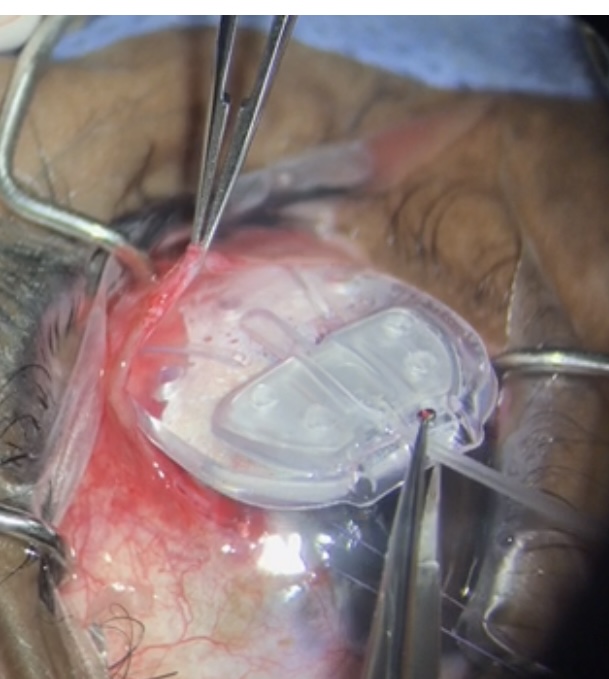


**Figure 4**. GDD sutured, and silicon tube inserted in the anterior chamber.


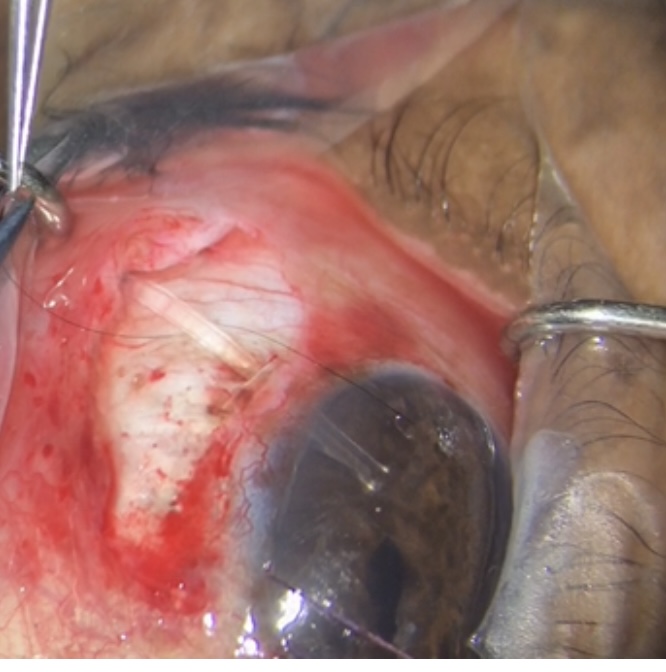


**Figure 5**. Scleral patch over the silicon tube.


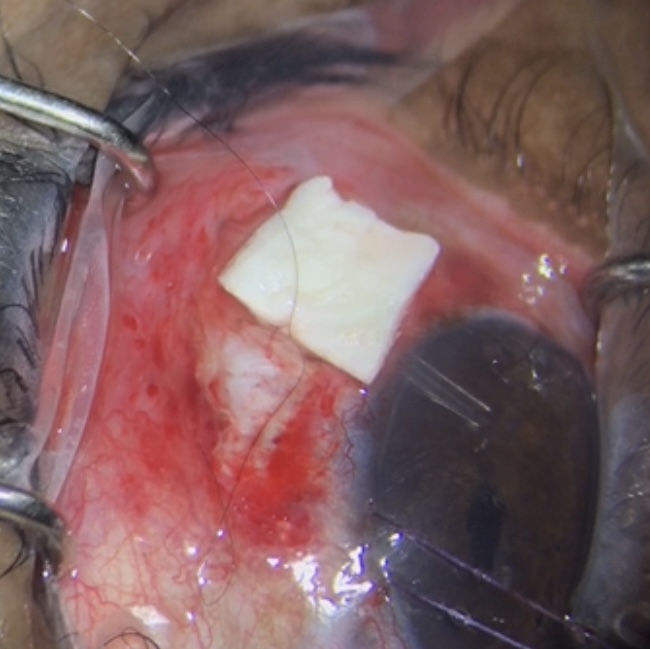


**Figure 6**. Ologen CM model 870051.


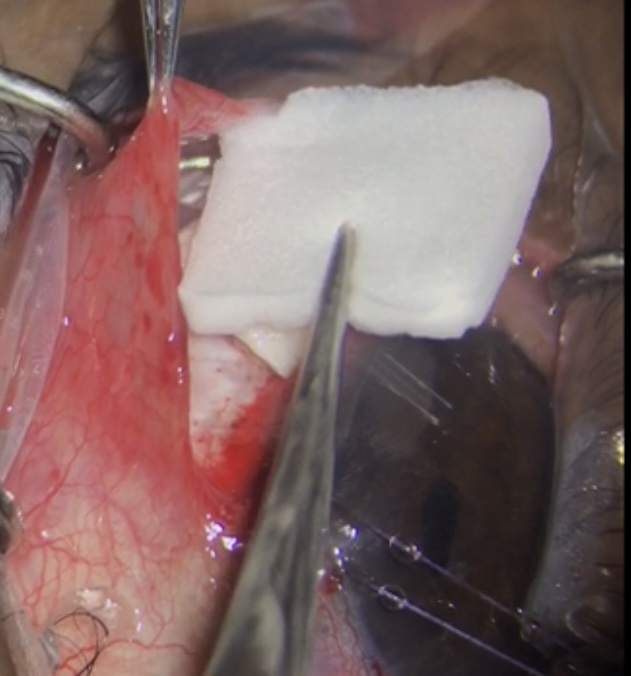


**Figure 7**. Ologen CM insertion above the GDD plate behind the valve.


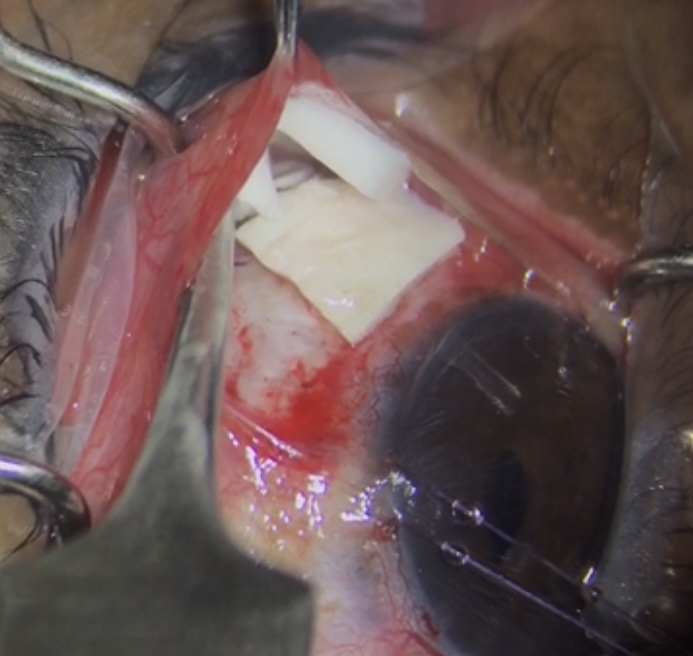


**Figure 8.** Ologen CM is already placed above the GDD plate.


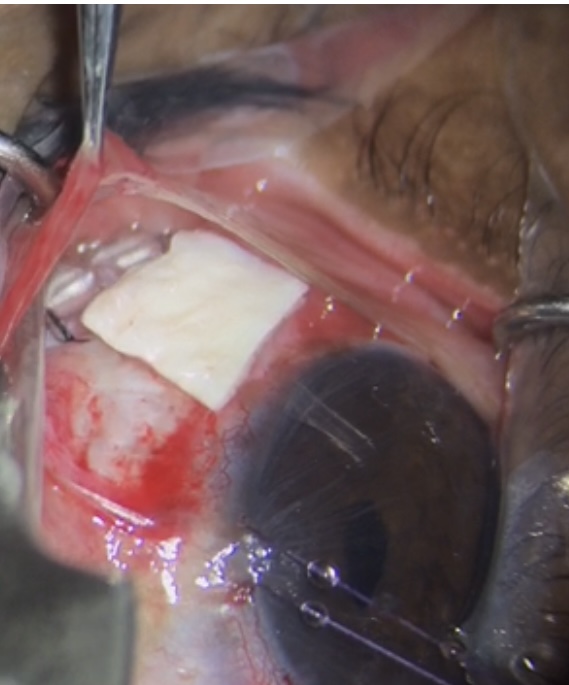


**Figure 9.** Closing sutures.


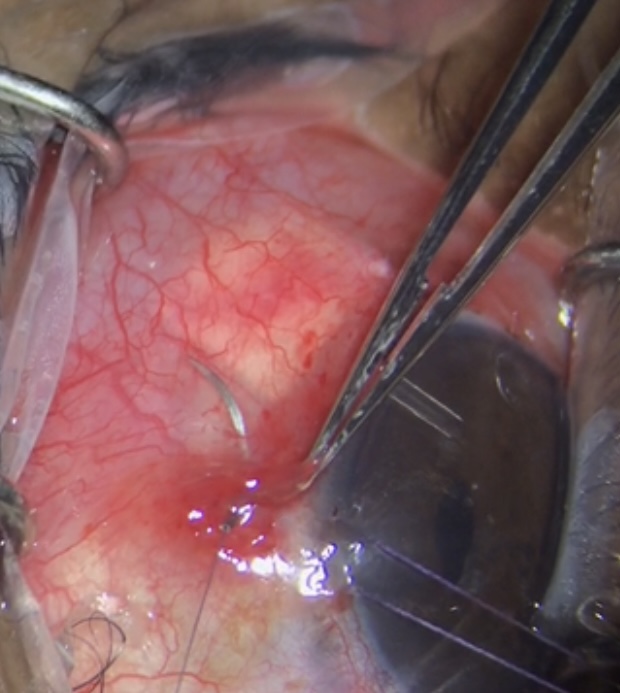

Supplement: Supplementary file 1 [file get_supplementary_file.php]
